# Supplementary material for: Design and construction of three-dimensional physiologically-based vascular branching networks for respiratory assist devices
Source: Royal Society of Chemistry journal article supplement (doi:10.1039/d1lc00287b), 2021-01-01
Supplement: d1lc00287b1.xlsx [file d1lc00287b1.xlsx]

## Sheet: Rev2 (2)
	Summary of Dimensions of RAD1 and RAD2 Devices
	Dimension/Parameter	RAD1	RAD2
	Channel Depth (microns)	200	65
	Channel Width (microns)	500	500
	Channel Length (cm)	4.7	15.1
	Number of Channels/Layer	112	176
	Total Active Membrane Area (cm2)	33.6	134.2		`
